# Supplementary material for: Positive selection for unpreferred codon usage in eukaryotic genomes
Source: PubMed Central journal article supplement (PMC1936986; doi:10.1186/1471-2148-7-119), 2007-07-18
Supplement: 1471-2148-7-119-S1.pdf [file 1471-2148-7-119-S1.pdf]

**Additional File 1.** Synonymous codon class assignments in *Cryptococcus spp.*

| AA  | Codon | status* | <sup>2</sup> | AA     | Codon | status* | <sup>2</sup> |        |
|-----|-------|---------|--------------|--------|-------|---------|--------------|--------|
| Phe | UUU   | u       | 685.0        | Ala    | GCU   | p       | 862.1        |        |
|     | UUC   | p       | 685.0        |        | GCC   | p       | 2075.3       |        |
| Leu | UUA   | u       | 797.1        |        | GCA   | u       | 2319.6       |        |
|     | UUG   | p       | 13.2         |        | GCG   | u       | 715.9        |        |
|     | CUU   | p       | 840.5        | Tyr    | UAU   | u       | 1192.3       |        |
|     | CUC   | p       | 3047.0       |        | UAC   | p       | 1192.3       |        |
|     |       | CUA     | u            | 607.2  | His   | CAU     | u            | 1480.6 |
|     |       | CUG     | u            | 1221.5 |       | CAC     | p            | 1480.6 |
| Ile | AUU   | p**     | 18.3         | Gln    | CAA   | u       | 580.4        |        |
|     | AUC   | p       | 1224.0       |        | CAG   | p       | 580.4        |        |
|     | AUA   | u       | 1542.0       | Asn    | AAU   | u       | 1918.6       |        |
| Met | AUG   | n/a     | n/a          |        | AAC   | p       | 1918.6       |        |
|     | Val   | GUU     | p            | 370.7  | Lys   | AAA     | u            | 3517.0 |
| GUC |       | p       | 1922.0       | AAG    |       | p       | 3517.0       |        |
|     |       | GUA     | u            | 988.9  | Asp   | GAU     | u            | 1528.5 |
|     |       | GUG     | u            | 1001.6 |       | GAC     | p            | 1528.5 |
| Ser | UCU   | p       | 2527.4       | Glu    | GAA   | u       | 1462.7       |        |
|     | UCC   | p       | 971.7        |        | GAG   | p       | 1462.7       |        |
|     |       | UCA     | u            | 1163.4 | Cys   | UGU     | e            | 5.6    |
|     |       | UCG     | u            | 845.8  |       | UGC     | e            | 5.6    |
|     |       | AGU     | u            | 228.8  | Trp   | UGG     | n/a          | n/a    |
|     |       | AGC     | u            | 9.8    |       | Arg     | CGU          | p      |
| Pro | CCU   | p       | 697.9        |        | CGC   |         | u            | 611.9  |
|     | CCC   | p       | 1651.0       |        | CGA   | p       | 2060.9       |        |
|     | CCA   | u       | 1562.1       |        | CGG   | u       | 674.9        |        |
|     | CCG   | u       | 757.8        |        | AGA   | u       | 670.1        |        |
| Thr | ACU   | p       | 629.0        |        | AGG   | p       | 670.1        |        |
|     | ACC   | p       | 1962.7       | Gly    | GGU   | p       | 4868.0       |        |
|     | ACA   | u       | 1553.6       |        | GGC   | p       | 16.6         |        |
|     | ACG   | u       | 898.0        |        | GGA   | u       | 1324.4       |        |
|     |       |         |              |        | GGG   | u       | 1402.5       |        |
|     |       |         |              |        |       |         |              |        |

\* p = preferred codon; u = unpreferred codon; e = equal codon

\*\* codon assigned equal status in strain *H99*
