# Supplementary material for: Positive selection for unpreferred codon usage in eukaryotic genomes
Source: PubMed Central journal article supplement (PMC1936986; doi:10.1186/1471-2148-7-119), 2007-07-18
Supplement: 1471-2148-7-119-S2.pdf [file 1471-2148-7-119-S2.pdf]

**Additional File 2.** Synonymous codon class assignments in *Drosophila spp.*

| AA  | Codon | status* | $J^2$   | AA  | Codon | status* | $J^2$   |
|-----|-------|---------|---------|-----|-------|---------|---------|
| Phe | UUU   | u       | 7189.2  | Ala | GCU   | u       | 573.4   |
|     | UUC   | p       | 7189.2  |     | GCC   | p       | 11724.1 |
| Leu | UUA   | u       | 2833.4  | Tyr | GCA   | u       | 4006.1  |
|     | UUG   | u       | 1283.9  |     | GCG   | u       | 442.6   |
|     | CUU   | u       | 2095.3  | UAU | u     | 3234.9  |         |
|     | CUC   | p       | 286.5   | UAC | p     | 3234.9  |         |
|     | CUA   | u       | 1868.1  | His | CAU   | u       | 1313.6  |
|     | CUG   | p       | 25963.3 | CAC | p     | 1313.6  |         |
| Ile | AUU   | u       | 1146.5  | Gln | CAA   | u       | 5385.2  |
|     | AUC   | p       | 10418.4 | CAG | p     | 5385.2  |         |
| Met | AUA   | u       | 4652.7  | Asn | AAU   | u       | 4600.4  |
|     | AUG   | n/a     | n/a     | AAC | p     | 4600.4  |         |
| Val | GUU   | u       | 2102.8  | Lys | AAA   | u       | 12019.1 |
|     | GUC   | p       | 852.8   | AAG | p     | 12019.1 |         |
|     | GUA   | u       | 2391.4  | Asp | GAU   | u       | 1274.0  |
|     | GUG   | p       | 4297.4  | GAC | p     | 1274.0  |         |
| Ser | UCU   | u       | 744.6   | Glu | GAA   | u       | 8697.3  |
|     | UCC   | p       | 3197.8  | GAG | p     | 8697.3  |         |
|     | UCA   | u       | 1708.8  | Cys | UGU   | u       | 1758.7  |
|     | UCG   | p       | 1005.4  | UGC | p     | 1758.7  |         |
|     | AGU   | u       | 1147.9  | Trp | UGG   | n/a     | n/a     |
| Pro | AGC   | p       | 203.0   | Arg | CGU   | p**     | 129.6   |
|     | CCU   | u       | 793.3   | CGC | p     | 6067.9  |         |
|     | CCC   | p       | 3573.1  | CGA | u     | 3359.9  |         |
|     | CCA   | u       | 1068.2  | CGG | u     | 980.7   |         |
|     | CCG   | e***    | 1.2     | AGA | u     | 571.7   |         |
| Thr | ACU   | u       | 1013.6  | Gly | AGG   | p       | 571.7   |
|     | ACC   | p       | 6217.3  |     | GGU   | u       | 25.2    |
|     | ACA   | u       | 1492.6  |     | GGC   | p       | 5098.3  |
|     | ACG   | u***    | 70.2    |     | GGA   | u       | 1415.0  |
|     |       |         |         |     | GGG   | u       | 827.7   |

\* p = preferred codon; u = unpreferred codon; e = equal codon

\*\* codon assigned equal status in *D. simulans* and *D. sechellia*

\*\*\* codon assigned preferred status in *D. simulans* and *D. sechellia*
