# Supplementary material for: Positive selection for unpreferred codon usage in eukaryotic genomes
Source: PubMed Central journal article supplement (PMC1936986; doi:10.1186/1471-2148-7-119), 2007-07-18
Supplement: 1471-2148-7-119-S4.pdf [file 1471-2148-7-119-S4.pdf]

**Additional File 4.** *Cryptococcus* genes exhibiting  $K_p/K_u < 1$  at  $p < 0.01$  (Fisher's exact test)

| gene     | pref_subs | pref_sites | unpref_subs | unpref_sites | Kp   | Ku   | Kp/Ku | 1-tailed p value |
|----------|-----------|------------|-------------|--------------|------|------|-------|------------------|
| CNF02120 | 10        | 86.82      | 34          | 94.35        | 0.13 | 0.49 | 0.25  | 7.31E-05         |
| CNA07150 | 20        | 142.98     | 41          | 120.89       | 0.15 | 0.45 | 0.34  | 8.39E-05         |
| CNE01810 | 15        | 103.23     | 44          | 118.11       | 0.16 | 0.51 | 0.31  | 1.00E-04         |
| CNK02390 | 0         | 29.63      | 12          | 33.29        | 0.00 | 0.49 | 0.00  | 1.64E-04         |
| CND03960 | 32        | 231.58     | 68          | 251.00       | 0.15 | 0.34 | 0.45  | 1.69E-04         |
| CNC05310 | 30        | 142.52     | 44          | 105.74       | 0.25 | 0.61 | 0.41  | 2.58E-04         |
| CND06010 | 44        | 289.44     | 113         | 432.02       | 0.17 | 0.32 | 0.53  | 2.85E-04         |
| CNG02100 | 36        | 176.85     | 68          | 185.30       | 0.24 | 0.50 | 0.47  | 3.19E-04         |
| CNJ00300 | 19        | 97.08      | 48          | 114.90       | 0.23 | 0.61 | 0.37  | 3.46E-04         |
| CNB02140 | 24        | 138.34     | 46          | 128.84       | 0.20 | 0.48 | 0.41  | 3.48E-04         |
| CNG02300 | 22        | 151.49     | 44          | 143.99       | 0.16 | 0.39 | 0.41  | 5.25E-04         |
| CNK01140 | 7         | 68.40      | 57          | 193.66       | 0.11 | 0.37 | 0.29  | 5.74E-04         |
| CNK02970 | 45        | 268.86     | 84          | 294.03       | 0.19 | 0.36 | 0.53  | 6.04E-04         |
| CNB00900 | 18        | 102.04     | 79          | 222.83       | 0.20 | 0.48 | 0.42  | 6.26E-04         |
| CNL05700 | 34        | 158.21     | 54          | 138.37       | 0.25 | 0.55 | 0.46  | 7.27E-04         |
| CNB04100 | 15        | 102.08     | 49          | 150.40       | 0.16 | 0.43 | 0.38  | 8.66E-04         |
| CNC01140 | 11        | 70.63      | 31          | 80.90        | 0.17 | 0.54 | 0.33  | 9.93E-04         |
| CNB02860 | 6         | 58.93      | 25          | 75.31        | 0.11 | 0.44 | 0.25  | 1.10E-03         |
| CNN00810 | 26        | 163.69     | 66          | 225.63       | 0.18 | 0.37 | 0.48  | 1.10E-03         |
| CNK00710 | 48        | 246.68     | 94          | 304.73       | 0.23 | 0.40 | 0.57  | 1.13E-03         |
| CNL04130 | 19        | 121.01     | 42          | 127.20       | 0.18 | 0.44 | 0.40  | 1.13E-03         |
| CND05200 | 37        | 185.72     | 78          | 234.91       | 0.23 | 0.44 | 0.53  | 1.15E-03         |
| CNC06370 | 8         | 62.61      | 46          | 138.93       | 0.14 | 0.44 | 0.32  | 1.18E-03         |
| CNG01650 | 14        | 118.68     | 44          | 165.95       | 0.13 | 0.33 | 0.39  | 1.25E-03         |
| CNF03930 | 5         | 55.28      | 34          | 114.93       | 0.10 | 0.38 | 0.26  | 1.26E-03         |
| CNA05300 | 31        | 187.26     | 68          | 230.05       | 0.19 | 0.38 | 0.50  | 1.29E-03         |
| CNB05050 | 5         | 71.87      | 17          | 62.81        | 0.07 | 0.34 | 0.22  | 1.30E-03         |
| CNE00660 | 16        | 116.40     | 39          | 128.33       | 0.15 | 0.39 | 0.39  | 1.38E-03         |
| CNC00470 | 8         | 53.91      | 26          | 64.81        | 0.17 | 0.57 | 0.29  | 1.45E-03         |
| CNN01220 | 45        | 255.53     | 81          | 284.64       | 0.20 | 0.36 | 0.56  | 1.47E-03         |
| CNA03490 | 6         | 61.46      | 20          | 60.31        | 0.10 | 0.44 | 0.24  | 1.49E-03         |
| CNC01280 | 14        | 96.80      | 35          | 109.36       | 0.16 | 0.42 | 0.39  | 1.92E-03         |
| CNE00110 | 21        | 123.54     | 36          | 106.85       | 0.19 | 0.45 | 0.43  | 1.94E-03         |
| CND05830 | 13        | 116.02     | 35          | 134.04       | 0.12 | 0.32 | 0.38  | 2.07E-03         |
| CND04030 | 14        | 124.38     | 32          | 124.66       | 0.12 | 0.31 | 0.39  | 2.08E-03         |
| CNB05310 | 20        | 111.24     | 40          | 114.91       | 0.21 | 0.47 | 0.44  | 2.12E-03         |
| CNN00470 | 13        | 87.37      | 26          | 73.43        | 0.17 | 0.48 | 0.35  | 2.15E-03         |
| CNL04400 | 21        | 121.58     | 48          | 144.24       | 0.20 | 0.44 | 0.45  | 2.25E-03         |
| CNI02960 | 11        | 98.25      | 32          | 117.01       | 0.12 | 0.34 | 0.36  | 2.40E-03         |
| CNG03670 | 39        | 227.08     | 90          | 324.88       | 0.20 | 0.35 | 0.56  | 2.40E-03         |
| CNA01910 | 16        | 101.62     | 48          | 152.45       | 0.18 | 0.41 | 0.43  | 2.45E-03         |
| CNK02350 | 15        | 87.81      | 46          | 133.39       | 0.19 | 0.46 | 0.42  | 2.50E-03         |
| CNA00030 | 26        | 145.02     | 43          | 129.04       | 0.20 | 0.44 | 0.46  | 2.58E-03         |
| CNH02490 | 38        | 148.53     | 65          | 157.14       | 0.31 | 0.60 | 0.52  | 2.62E-03         |
| CNH02670 | 5         | 49.58      | 15          | 42.52        | 0.11 | 0.48 | 0.23  | 2.74E-03         |

|          |    |        |    |        |      |      |      |          |
|----------|----|--------|----|--------|------|------|------|----------|
| CNF02560 | 11 | 92.80  | 28 | 98.27  | 0.13 | 0.36 | 0.36 | 2.89E-03 |
| CNA05830 | 6  | 59.53  | 29 | 97.18  | 0.11 | 0.38 | 0.28 | 2.90E-03 |
| CNG01380 | 7  | 39.74  | 18 | 37.66  | 0.20 | 0.76 | 0.26 | 2.93E-03 |
| CNK01570 | 18 | 115.01 | 30 | 91.85  | 0.18 | 0.43 | 0.41 | 2.98E-03 |
| CNC05100 | 1  | 25.36  | 12 | 33.26  | 0.04 | 0.49 | 0.08 | 2.99E-03 |
| CND05480 | 14 | 104.28 | 34 | 115.65 | 0.15 | 0.37 | 0.40 | 3.04E-03 |
| CNC05730 | 18 | 130.90 | 52 | 195.83 | 0.15 | 0.33 | 0.46 | 3.05E-03 |
| CNC05090 | 29 | 199.77 | 56 | 220.57 | 0.16 | 0.31 | 0.52 | 3.10E-03 |
| CNA07530 | 11 | 79.92  | 42 | 139.45 | 0.15 | 0.39 | 0.39 | 3.60E-03 |
| CNH02850 | 32 | 163.11 | 67 | 206.45 | 0.23 | 0.43 | 0.53 | 3.69E-03 |
| CNA07940 | 8  | 61.62  | 23 | 68.50  | 0.14 | 0.45 | 0.32 | 3.79E-03 |
| CNJ01740 | 6  | 61.23  | 32 | 115.62 | 0.11 | 0.35 | 0.30 | 3.82E-03 |
| CNL04410 | 4  | 35.81  | 22 | 57.18  | 0.12 | 0.54 | 0.22 | 3.92E-03 |
| CNN01490 | 19 | 130.85 | 51 | 187.39 | 0.16 | 0.34 | 0.48 | 3.94E-03 |
| CNK00670 | 16 | 82.80  | 28 | 71.71  | 0.22 | 0.55 | 0.41 | 3.95E-03 |
| CNC00480 | 20 | 94.51  | 31 | 77.77  | 0.25 | 0.57 | 0.44 | 4.00E-03 |
| CNB02720 | 10 | 72.40  | 18 | 51.83  | 0.15 | 0.47 | 0.33 | 4.06E-03 |
| CNE01260 | 6  | 45.57  | 26 | 70.22  | 0.14 | 0.51 | 0.28 | 4.19E-03 |
| CNC03120 | 32 | 214.11 | 79 | 321.49 | 0.17 | 0.30 | 0.56 | 4.36E-03 |
| CND05770 | 1  | 41.05  | 11 | 49.40  | 0.02 | 0.26 | 0.09 | 4.70E-03 |
| CNK00930 | 14 | 128.51 | 32 | 137.92 | 0.12 | 0.28 | 0.42 | 4.73E-03 |
| CNA03280 | 23 | 156.46 | 40 | 148.59 | 0.16 | 0.33 | 0.49 | 4.83E-03 |
| CNH02920 | 3  | 24.30  | 15 | 31.53  | 0.13 | 0.75 | 0.18 | 4.84E-03 |
| CNL05940 | 1  | 22.11  | 17 | 51.98  | 0.05 | 0.43 | 0.11 | 4.86E-03 |
| CNI03390 | 37 | 202.50 | 64 | 220.55 | 0.21 | 0.37 | 0.57 | 4.89E-03 |
| CNL05530 | 6  | 37.71  | 21 | 47.11  | 0.18 | 0.68 | 0.26 | 4.91E-03 |
| CNC01340 | 11 | 98.98  | 28 | 109.56 | 0.12 | 0.31 | 0.38 | 4.92E-03 |
| CNA06750 | 38 | 194.85 | 73 | 240.28 | 0.23 | 0.39 | 0.58 | 4.95E-03 |
| CNE01370 | 15 | 68.97  | 33 | 78.50  | 0.26 | 0.62 | 0.42 | 4.96E-03 |
| CNN00530 | 30 | 174.11 | 51 | 173.01 | 0.20 | 0.37 | 0.52 | 4.99E-03 |
| CNC02650 | 28 | 158.44 | 48 | 159.60 | 0.20 | 0.38 | 0.52 | 5.04E-03 |
| CND06150 | 27 | 129.15 | 81 | 238.83 | 0.25 | 0.45 | 0.54 | 5.47E-03 |
| CND04680 | 26 | 179.41 | 46 | 178.57 | 0.16 | 0.32 | 0.51 | 5.50E-03 |
| CNH01860 | 42 | 201.21 | 83 | 265.87 | 0.24 | 0.40 | 0.61 | 5.59E-03 |
| CNF04310 | 1  | 36.85  | 10 | 41.34  | 0.03 | 0.29 | 0.09 | 5.59E-03 |
| CNG01170 | 12 | 71.59  | 26 | 72.55  | 0.19 | 0.49 | 0.39 | 5.61E-03 |
| CNI02520 | 4  | 31.64  | 11 | 24.49  | 0.14 | 0.69 | 0.20 | 5.66E-03 |
| CNK00890 | 17 | 107.64 | 35 | 112.35 | 0.18 | 0.40 | 0.44 | 5.73E-03 |
| CNB01970 | 30 | 197.23 | 69 | 274.25 | 0.17 | 0.31 | 0.55 | 5.73E-03 |
| CNG03400 | 12 | 64.36  | 27 | 67.16  | 0.21 | 0.58 | 0.37 | 5.80E-03 |
| CNM01840 | 11 | 78.93  | 26 | 84.00  | 0.15 | 0.40 | 0.39 | 5.82E-03 |
| CNN00640 | 14 | 87.16  | 29 | 86.51  | 0.18 | 0.44 | 0.41 | 5.85E-03 |
| CNN00960 | 5  | 43.78  | 16 | 45.91  | 0.12 | 0.47 | 0.26 | 6.00E-03 |
| CNK00730 | 18 | 98.06  | 40 | 116.86 | 0.21 | 0.46 | 0.46 | 6.04E-03 |
| CNF02730 | 9  | 67.39  | 23 | 72.77  | 0.15 | 0.41 | 0.36 | 6.08E-03 |
| CNI03350 | 16 | 104.28 | 32 | 106.80 | 0.17 | 0.38 | 0.45 | 6.27E-03 |
| CNA07550 | 51 | 225.60 | 97 | 299.83 | 0.27 | 0.42 | 0.64 | 6.30E-03 |
| CNB00070 | 1  | 18.12  | 11 | 27.95  | 0.06 | 0.56 | 0.10 | 6.48E-03 |
| CNM02300 | 3  | 34.99  | 14 | 41.44  | 0.09 | 0.45 | 0.20 | 6.54E-03 |
| CNA04500 | 11 | 61.60  | 23 | 59.97  | 0.20 | 0.54 | 0.38 | 6.65E-03 |

|          |    |        |    |        |      |      |      |          |
|----------|----|--------|----|--------|------|------|------|----------|
| CNJ00810 | 36 | 202.71 | 58 | 206.50 | 0.20 | 0.35 | 0.58 | 6.89E-03 |
| CND05270 | 1  | 23.34  | 17 | 56.97  | 0.04 | 0.38 | 0.12 | 6.94E-03 |
| CNC05030 | 1  | 24.54  | 11 | 33.37  | 0.04 | 0.43 | 0.10 | 7.07E-03 |
| CNC04910 | 5  | 69.59  | 18 | 80.98  | 0.08 | 0.26 | 0.29 | 7.10E-03 |
| CNA05850 | 4  | 48.02  | 23 | 85.82  | 0.09 | 0.33 | 0.27 | 7.18E-03 |
| CNF02900 | 9  | 73.69  | 22 | 75.93  | 0.13 | 0.37 | 0.36 | 7.22E-03 |
| CNM01790 | 22 | 122.29 | 51 | 166.91 | 0.21 | 0.39 | 0.52 | 7.36E-03 |
| CNL03980 | 14 | 68.69  | 28 | 70.39  | 0.24 | 0.57 | 0.42 | 7.39E-03 |
| CNL06360 | 6  | 39.90  | 12 | 27.55  | 0.17 | 0.65 | 0.26 | 7.48E-03 |
| CNA03050 | 23 | 127.54 | 46 | 149.82 | 0.21 | 0.39 | 0.52 | 7.71E-03 |
| CNH01870 | 1  | 30.16  | 12 | 47.94  | 0.03 | 0.30 | 0.11 | 7.75E-03 |
| CNF04020 | 23 | 144.62 | 46 | 164.27 | 0.18 | 0.35 | 0.51 | 7.84E-03 |
| CNM01890 | 11 | 67.84  | 29 | 85.97  | 0.18 | 0.45 | 0.41 | 7.87E-03 |
| CNB00770 | 17 | 97.11  | 32 | 95.01  | 0.20 | 0.45 | 0.45 | 7.93E-03 |
| CNC02500 | 26 | 154.22 | 39 | 132.66 | 0.19 | 0.37 | 0.51 | 8.08E-03 |
| CNH02020 | 9  | 52.26  | 27 | 73.00  | 0.20 | 0.51 | 0.38 | 8.13E-03 |
| CNE01100 | 18 | 99.93  | 40 | 123.39 | 0.21 | 0.42 | 0.49 | 8.30E-03 |
| CNL04710 | 15 | 105.96 | 40 | 148.15 | 0.16 | 0.33 | 0.47 | 8.45E-03 |
| CNI02370 | 10 | 60.50  | 38 | 109.25 | 0.19 | 0.47 | 0.40 | 8.64E-03 |
| CNJ00760 | 5  | 46.53  | 16 | 50.93  | 0.12 | 0.41 | 0.28 | 8.68E-03 |
| CNB02270 | 21 | 152.25 | 31 | 119.53 | 0.15 | 0.32 | 0.48 | 8.74E-03 |
| CNC04500 | 9  | 56.59  | 26 | 74.94  | 0.18 | 0.47 | 0.38 | 8.77E-03 |
| CNJ01760 | 23 | 119.57 | 36 | 108.95 | 0.22 | 0.44 | 0.51 | 8.97E-03 |
| CNK00560 | 34 | 185.76 | 68 | 241.52 | 0.21 | 0.35 | 0.59 | 9.08E-03 |
| CNB01740 | 12 | 83.15  | 56 | 199.23 | 0.16 | 0.35 | 0.46 | 9.20E-03 |
| CNA06970 | 23 | 114.18 | 58 | 173.68 | 0.23 | 0.44 | 0.53 | 9.39E-03 |
| CNB04470 | 1  | 20.45  | 21 | 67.81  | 0.05 | 0.40 | 0.13 | 9.45E-03 |
| CNB00030 | 5  | 52.58  | 25 | 95.97  | 0.10 | 0.32 | 0.32 | 9.47E-03 |
| CNA01290 | 20 | 119.36 | 64 | 223.62 | 0.19 | 0.36 | 0.53 | 9.63E-03 |
| CNB03820 | 2  | 23.43  | 11 | 28.73  | 0.09 | 0.54 | 0.17 | 9.72E-03 |
