# Supplementary material for: Positive selection for unpreferred codon usage in eukaryotic genomes
Source: PubMed Central journal article supplement (PMC1936986; doi:10.1186/1471-2148-7-119), 2007-07-18
Supplement: 1471-2148-7-119-S5.pdf [file 1471-2148-7-119-S5.pdf]

**Additional File 5.** *Drosophila* genes exhibiting  $K_p/K_u < 1$  at  $p < 0.01$  (Fisher's exact test)

| gene       | pref_subs | pref_sites | unpref_subs | unpref_sites | Kp   | Ku   | Kp/Ku | 1-tailed p value |
|------------|-----------|------------|-------------|--------------|------|------|-------|------------------|
| CG6690-PA  | 4         | 121.03     | 29          | 155.86       | 0.03 | 0.21 | 0.16  | 4.03E-05         |
| CG6539-PA  | 10        | 208.86     | 44          | 274.77       | 0.05 | 0.18 | 0.27  | 4.64E-05         |
| CG18095-PA | 7         | 121.36     | 35          | 166.52       | 0.06 | 0.25 | 0.24  | 1.60E-04         |
| CG33288-PB | 7         | 223.74     | 41          | 358.13       | 0.03 | 0.12 | 0.26  | 1.74E-04         |
| CG3491-PA  | 13        | 316.83     | 54          | 486.19       | 0.04 | 0.12 | 0.35  | 2.11E-04         |
| CG6630-PA  | 39        | 463.27     | 99          | 645.85       | 0.09 | 0.17 | 0.52  | 2.85E-04         |
| CG31622-PA | 0         | 79.66      | 13          | 103.14       | 0.00 | 0.14 | 0.00  | 4.30E-04         |
| CG9506-PA  | 10        | 157.59     | 92          | 558.46       | 0.07 | 0.19 | 0.36  | 4.46E-04         |
| CG14376-PA | 12        | 167.72     | 45          | 241.94       | 0.08 | 0.21 | 0.35  | 5.07E-04         |
| CG17046-PA | 12        | 364.55     | 79          | 953.16       | 0.03 | 0.09 | 0.38  | 5.57E-04         |
| CG32121-PA | 6         | 92.07      | 62          | 299.76       | 0.07 | 0.24 | 0.28  | 6.73E-04         |
| CG1487-PA  | 1         | 90.03      | 18          | 141.76       | 0.01 | 0.14 | 0.08  | 7.57E-04         |
| CG4903-PA  | 23        | 453.63     | 66          | 633.19       | 0.05 | 0.11 | 0.47  | 8.87E-04         |
| CG16965-PA | 8         | 134.92     | 38          | 217.67       | 0.06 | 0.20 | 0.31  | 9.21E-04         |
| CG15326-PA | 6         | 94.00      | 45          | 221.88       | 0.07 | 0.24 | 0.28  | 9.34E-04         |
| CG32238-PA | 8         | 110.37     | 36          | 169.47       | 0.08 | 0.25 | 0.31  | 1.02E-03         |
| CG9626-PA  | 17        | 320.24     | 76          | 666.44       | 0.06 | 0.12 | 0.45  | 1.07E-03         |
| CG5394-PA  | 23        | 325.80     | 93          | 685.57       | 0.07 | 0.15 | 0.50  | 1.13E-03         |
| CG32026-PA | 9         | 165.44     | 33          | 210.26       | 0.06 | 0.18 | 0.32  | 1.15E-03         |
| CG7628-PA  | 2         | 91.42      | 37          | 287.56       | 0.02 | 0.14 | 0.16  | 1.24E-03         |
| CG3327-PC  | 3         | 151.31     | 41          | 450.78       | 0.02 | 0.10 | 0.21  | 1.26E-03         |
| CG8833-PA  | 12        | 188.09     | 47          | 300.79       | 0.07 | 0.18 | 0.38  | 1.28E-03         |
| CG30084-PF | 8         | 234.70     | 58          | 609.59       | 0.03 | 0.10 | 0.34  | 1.28E-03         |
| CG7803-PA  | 2         | 77.90      | 37          | 251.84       | 0.03 | 0.16 | 0.16  | 1.33E-03         |
| CG4063-PA  | 5         | 131.07     | 37          | 280.79       | 0.04 | 0.14 | 0.27  | 1.67E-03         |
| CG7341-PB  | 1         | 74.64      | 16          | 118.64       | 0.01 | 0.15 | 0.09  | 1.91E-03         |
| CG7526-PB  | 29        | 344.00     | 71          | 466.84       | 0.09 | 0.17 | 0.53  | 2.04E-03         |
| CG5374-PB  | 1         | 68.18      | 40          | 312.81       | 0.01 | 0.14 | 0.11  | 2.08E-03         |
| CG16742-PA | 21        | 367.50     | 41          | 342.94       | 0.06 | 0.13 | 0.46  | 2.11E-03         |
| CG5849-PA  | 11        | 188.26     | 48          | 343.97       | 0.06 | 0.15 | 0.39  | 2.18E-03         |
| CG2189-PA  | 2         | 95.74      | 27          | 232.31       | 0.02 | 0.13 | 0.17  | 2.54E-03         |
| CG10422-PA | 1         | 66.51      | 20          | 146.07       | 0.02 | 0.15 | 0.10  | 2.93E-03         |
| CG13840-PA | 1         | 70.63      | 23          | 184.15       | 0.01 | 0.14 | 0.10  | 3.19E-03         |
| CG11856-PA | 34        | 548.61     | 90          | 864.83       | 0.06 | 0.11 | 0.58  | 3.40E-03         |
| CG18368-PA | 0         | 254.96     | 7           | 211.92       | 0.00 | 0.03 | 0.00  | 3.69E-03         |
| CG31304-PA | 12        | 237.43     | 68          | 620.74       | 0.05 | 0.12 | 0.44  | 3.74E-03         |
| CG7223-PB  | 13        | 119.77     | 67          | 302.96       | 0.12 | 0.26 | 0.45  | 3.75E-03         |
| CG6490-PA  | 19        | 250.98     | 74          | 519.41       | 0.08 | 0.16 | 0.51  | 3.99E-03         |
| CG11259-PA | 4         | 261.90     | 16          | 253.49       | 0.02 | 0.07 | 0.23  | 4.03E-03         |
| CG14157-PA | 8         | 89.93      | 28          | 118.02       | 0.09 | 0.29 | 0.33  | 4.06E-03         |
| CG1677-PA  | 12        | 155.90     | 63          | 385.66       | 0.08 | 0.18 | 0.44  | 4.24E-03         |
| CG4881-PB  | 11        | 228.41     | 56          | 516.39       | 0.05 | 0.12 | 0.42  | 4.44E-03         |
| CG31805-PA | 5         | 110.18     | 16          | 98.15        | 0.05 | 0.18 | 0.25  | 4.48E-03         |
| CG7012-PB  | 9         | 125.36     | 46          | 267.06       | 0.08 | 0.20 | 0.39  | 4.52E-03         |
| CG5747-PA  | 27        | 352.25     | 84          | 634.33       | 0.08 | 0.15 | 0.55  | 4.58E-03         |
| CG8961-PA  | 1         | 134.45     | 11          | 152.19       | 0.01 | 0.08 | 0.10  | 5.10E-03         |

|            |    |        |    |        |      |      |      |          |
|------------|----|--------|----|--------|------|------|------|----------|
| CG8540-PA  | 5  | 111.25 | 17 | 109.61 | 0.05 | 0.17 | 0.27 | 5.25E-03 |
| CG33128-PA | 0  | 35.95  | 33 | 226.96 | 0.00 | 0.16 | 0.00 | 5.35E-03 |
| CG8102-PA  | 4  | 96.91  | 24 | 166.32 | 0.04 | 0.16 | 0.26 | 5.45E-03 |
| CG31510-PA | 13 | 290.99 | 27 | 260.04 | 0.05 | 0.11 | 0.41 | 5.65E-03 |
| CG13295-PA | 5  | 85.40  | 35 | 200.17 | 0.06 | 0.20 | 0.31 | 5.77E-03 |
| CG7003-PA  | 15 | 225.59 | 59 | 449.95 | 0.07 | 0.14 | 0.48 | 5.90E-03 |
| CG5149-PA  | 7  | 92.46  | 31 | 158.79 | 0.08 | 0.23 | 0.35 | 6.09E-03 |
| CG12785-PA | 16 | 257.28 | 50 | 409.82 | 0.06 | 0.13 | 0.49 | 6.55E-03 |
| CG3809-PA  | 3  | 66.61  | 27 | 159.49 | 0.05 | 0.19 | 0.24 | 6.57E-03 |
| CG18609-PA | 3  | 48.85  | 23 | 98.04  | 0.06 | 0.28 | 0.23 | 7.19E-03 |
| CG11762-PA | 1  | 56.87  | 15 | 106.28 | 0.02 | 0.16 | 0.11 | 7.21E-03 |
| CG8147-PA  | 2  | 83.07  | 26 | 226.56 | 0.02 | 0.12 | 0.20 | 7.49E-03 |
| CG3810-PB  | 8  | 162.34 | 47 | 399.02 | 0.05 | 0.13 | 0.40 | 7.75E-03 |
| CG9117-PA  | 0  | 36.85  | 13 | 86.06  | 0.00 | 0.17 | 0.00 | 7.92E-03 |
| CG5455-PC  | 10 | 144.60 | 39 | 252.39 | 0.07 | 0.17 | 0.42 | 8.40E-03 |
| CG18405-PA | 3  | 140.08 | 32 | 406.95 | 0.02 | 0.08 | 0.26 | 8.63E-03 |
| CG4866-PA  | 0  | 26.71  | 15 | 80.43  | 0.00 | 0.21 | 0.00 | 8.80E-03 |
| CG14882-PA | 6  | 81.95  | 32 | 167.12 | 0.08 | 0.22 | 0.35 | 8.87E-03 |
| CG11349-PA | 14 | 144.95 | 34 | 174.20 | 0.10 | 0.23 | 0.46 | 8.99E-03 |
| CG18112-PA | 2  | 54.40  | 36 | 223.60 | 0.04 | 0.18 | 0.21 | 9.30E-03 |
| CG1523-PA  | 3  | 81.44  | 38 | 290.46 | 0.04 | 0.14 | 0.26 | 9.31E-03 |
| CG4694-PA  | 3  | 79.60  | 24 | 170.10 | 0.04 | 0.16 | 0.25 | 9.38E-03 |
| CG3616-PA  | 3  | 61.80  | 39 | 235.94 | 0.05 | 0.19 | 0.27 | 9.83E-03 |
| CNI03390   | 37 | 202.50 | 64 | 220.55 | 0.21 | 0.37 | 0.57 | 4.89E-03 |
| CNL05530   | 6  | 37.71  | 21 | 47.11  | 0.18 | 0.68 | 0.26 | 4.91E-03 |
| CNC01340   | 11 | 98.98  | 28 | 109.56 | 0.12 | 0.31 | 0.38 | 4.92E-03 |
| CNA06750   | 38 | 194.85 | 73 | 240.28 | 0.23 | 0.39 | 0.58 | 4.95E-03 |
| CNE01370   | 15 | 68.97  | 33 | 78.50  | 0.26 | 0.62 | 0.42 | 4.96E-03 |
| CNN00530   | 30 | 174.11 | 51 | 173.01 | 0.20 | 0.37 | 0.52 | 4.99E-03 |
| CNC02650   | 28 | 158.44 | 48 | 159.60 | 0.20 | 0.38 | 0.52 | 5.04E-03 |
| CND06150   | 27 | 129.15 | 81 | 238.83 | 0.25 | 0.45 | 0.54 | 5.47E-03 |
| CND04680   | 26 | 179.41 | 46 | 178.57 | 0.16 | 0.32 | 0.51 | 5.50E-03 |
| CNH01860   | 42 | 201.21 | 83 | 265.87 | 0.24 | 0.40 | 0.61 | 5.59E-03 |
| CNF04310   | 1  | 36.85  | 10 | 41.34  | 0.03 | 0.29 | 0.09 | 5.59E-03 |
| CNG01170   | 12 | 71.59  | 26 | 72.55  | 0.19 | 0.49 | 0.39 | 5.61E-03 |
| CNI02520   | 4  | 31.64  | 11 | 24.49  | 0.14 | 0.69 | 0.20 | 5.66E-03 |
| CNK00890   | 17 | 107.64 | 35 | 112.35 | 0.18 | 0.40 | 0.44 | 5.73E-03 |
| CNB01970   | 30 | 197.23 | 69 | 274.25 | 0.17 | 0.31 | 0.55 | 5.73E-03 |
| CNG03400   | 12 | 64.36  | 27 | 67.16  | 0.21 | 0.58 | 0.37 | 5.80E-03 |
| CNM01840   | 11 | 78.93  | 26 | 84.00  | 0.15 | 0.40 | 0.39 | 5.82E-03 |
| CNN00640   | 14 | 87.16  | 29 | 86.51  | 0.18 | 0.44 | 0.41 | 5.85E-03 |
| CNN00960   | 5  | 43.78  | 16 | 45.91  | 0.12 | 0.47 | 0.26 | 6.00E-03 |
| CNK00730   | 18 | 98.06  | 40 | 116.86 | 0.21 | 0.46 | 0.46 | 6.04E-03 |
| CNF02730   | 9  | 67.39  | 23 | 72.77  | 0.15 | 0.41 | 0.36 | 6.08E-03 |
| CNI03350   | 16 | 104.28 | 32 | 106.80 | 0.17 | 0.38 | 0.45 | 6.27E-03 |
| CNA07550   | 51 | 225.60 | 97 | 299.83 | 0.27 | 0.42 | 0.64 | 6.30E-03 |
| CNB00070   | 1  | 18.12  | 11 | 27.95  | 0.06 | 0.56 | 0.10 | 6.48E-03 |
| CNM02300   | 3  | 34.99  | 14 | 41.44  | 0.09 | 0.45 | 0.20 | 6.54E-03 |
| CNA04500   | 11 | 61.60  | 23 | 59.97  | 0.20 | 0.54 | 0.38 | 6.65E-03 |
| CNJ00810   | 36 | 202.71 | 58 | 206.50 | 0.20 | 0.35 | 0.58 | 6.89E-03 |

|          |    |        |    |        |      |      |      |          |
|----------|----|--------|----|--------|------|------|------|----------|
| CND05270 | 1  | 23.34  | 17 | 56.97  | 0.04 | 0.38 | 0.12 | 6.94E-03 |
| CNC05030 | 1  | 24.54  | 11 | 33.37  | 0.04 | 0.43 | 0.10 | 7.07E-03 |
| CNC04910 | 5  | 69.59  | 18 | 80.98  | 0.08 | 0.26 | 0.29 | 7.10E-03 |
| CNA05850 | 4  | 48.02  | 23 | 85.82  | 0.09 | 0.33 | 0.27 | 7.18E-03 |
| CNF02900 | 9  | 73.69  | 22 | 75.93  | 0.13 | 0.37 | 0.36 | 7.22E-03 |
| CNM01790 | 22 | 122.29 | 51 | 166.91 | 0.21 | 0.39 | 0.52 | 7.36E-03 |
| CNL03980 | 14 | 68.69  | 28 | 70.39  | 0.24 | 0.57 | 0.42 | 7.39E-03 |
| CNL06360 | 6  | 39.90  | 12 | 27.55  | 0.17 | 0.65 | 0.26 | 7.48E-03 |
| CNA03050 | 23 | 127.54 | 46 | 149.82 | 0.21 | 0.39 | 0.52 | 7.71E-03 |
| CNH01870 | 1  | 30.16  | 12 | 47.94  | 0.03 | 0.30 | 0.11 | 7.75E-03 |
| CNF04020 | 23 | 144.62 | 46 | 164.27 | 0.18 | 0.35 | 0.51 | 7.84E-03 |
| CNM01890 | 11 | 67.84  | 29 | 85.97  | 0.18 | 0.45 | 0.41 | 7.87E-03 |
| CNB00770 | 17 | 97.11  | 32 | 95.01  | 0.20 | 0.45 | 0.45 | 7.93E-03 |
| CNC02500 | 26 | 154.22 | 39 | 132.66 | 0.19 | 0.37 | 0.51 | 8.08E-03 |
| CNH02020 | 9  | 52.26  | 27 | 73.00  | 0.20 | 0.51 | 0.38 | 8.13E-03 |
| CNE01100 | 18 | 99.93  | 40 | 123.39 | 0.21 | 0.42 | 0.49 | 8.30E-03 |
| CNL04710 | 15 | 105.96 | 40 | 148.15 | 0.16 | 0.33 | 0.47 | 8.45E-03 |
| CNI02370 | 10 | 60.50  | 38 | 109.25 | 0.19 | 0.47 | 0.40 | 8.64E-03 |
| CNJ00760 | 5  | 46.53  | 16 | 50.93  | 0.12 | 0.41 | 0.28 | 8.68E-03 |
| CNB02270 | 21 | 152.25 | 31 | 119.53 | 0.15 | 0.32 | 0.48 | 8.74E-03 |
| CNC04500 | 9  | 56.59  | 26 | 74.94  | 0.18 | 0.47 | 0.38 | 8.77E-03 |
| CNJ01760 | 23 | 119.57 | 36 | 108.95 | 0.22 | 0.44 | 0.51 | 8.97E-03 |
| CNK00560 | 34 | 185.76 | 68 | 241.52 | 0.21 | 0.35 | 0.59 | 9.08E-03 |
| CNB01740 | 12 | 83.15  | 56 | 199.23 | 0.16 | 0.35 | 0.46 | 9.20E-03 |
| CNA06970 | 23 | 114.18 | 58 | 173.68 | 0.23 | 0.44 | 0.53 | 9.39E-03 |
| CNB04470 | 1  | 20.45  | 21 | 67.81  | 0.05 | 0.40 | 0.13 | 9.45E-03 |
| CNB00030 | 5  | 52.58  | 25 | 95.97  | 0.10 | 0.32 | 0.32 | 9.47E-03 |
| CNA01290 | 20 | 119.36 | 64 | 223.62 | 0.19 | 0.36 | 0.53 | 9.63E-03 |
| CNB03820 | 2  | 23.43  | 11 | 28.73  | 0.09 | 0.54 | 0.17 | 9.72E-03 |
