# Supplementary material for: Positive selection for unpreferred codon usage in eukaryotic genomes
Source: PubMed Central journal article supplement (PMC1936986; doi:10.1186/1471-2148-7-119), 2007-07-18
Supplement: 1471-2148-7-119-S6.pdf [file 1471-2148-7-119-S6.pdf]

**Additional File 6.** *Saccharomyces* genes exhibiting  $K_p/K_u < 1$  at  $p < 0.01$  (Fisher's exact test)

| gene    | pref_subs | pref_sites | unpref_subs | unpref_sites | Kp   | Ku   | Kp/Ku | 1-tailed p value |
|---------|-----------|------------|-------------|--------------|------|------|-------|------------------|
| TOR2    | 155       | 595.32     | 163         | 673.05       | 0.32 | 0.29 | 1.09  | 0.00E+00         |
| HOP1    | 25        | 140.74     | 48          | 134.86       | 0.20 | 0.48 | 0.42  | 4.37E-04         |
| FRE1    | 7         | 133.56     | 28          | 152.52       | 0.05 | 0.21 | 0.26  | 4.41E-04         |
| YMC1    | 5         | 60.86      | 29          | 96.83        | 0.09 | 0.38 | 0.23  | 6.33E-04         |
| BOS1    | 1         | 37.06      | 13          | 43.86        | 0.03 | 0.38 | 0.07  | 9.49E-04         |
| APC1    | 67        | 384.26     | 99          | 374.89       | 0.20 | 0.33 | 0.61  | 1.37E-03         |
| PEX28   | 17        | 131.08     | 38          | 133.34       | 0.14 | 0.36 | 0.40  | 1.38E-03         |
| MUM2    | 12        | 94.05      | 28          | 88.79        | 0.14 | 0.41 | 0.34  | 1.62E-03         |
| GLN3    | 19        | 158.45     | 42          | 167.54       | 0.13 | 0.31 | 0.43  | 1.79E-03         |
| TFC3    | 49        | 273.11     | 69          | 240.15       | 0.21 | 0.36 | 0.57  | 2.59E-03         |
| AME1    | 10        | 64.16      | 22          | 55.39        | 0.17 | 0.57 | 0.31  | 2.60E-03         |
| YMR171C | 26        | 135.40     | 45          | 131.71       | 0.22 | 0.46 | 0.49  | 2.94E-03         |
| YOR129C | 7         | 172.37     | 20          | 157.21       | 0.04 | 0.14 | 0.30  | 3.58E-03         |
| TOS3    | 16        | 124.72     | 30          | 110.46       | 0.14 | 0.34 | 0.42  | 3.73E-03         |
| PCL6    | 13        | 95.97      | 28          | 93.39        | 0.15 | 0.38 | 0.39  | 4.03E-03         |
| YLR446W | 17        | 97.04      | 35          | 100.63       | 0.20 | 0.47 | 0.43  | 4.18E-03         |
| YAP3    | 5         | 50.81      | 16          | 49.45        | 0.11 | 0.42 | 0.25  | 4.33E-03         |
| PNT1    | 17        | 96.01      | 32          | 90.34        | 0.20 | 0.48 | 0.42  | 4.60E-03         |
| BUR6    | 2         | 29.75      | 13          | 36.03        | 0.07 | 0.49 | 0.14  | 5.08E-03         |
| NHA1    | 17        | 197.32     | 41          | 235.58       | 0.09 | 0.20 | 0.46  | 5.10E-03         |
| RNH1    | 12        | 77.41      | 27          | 78.23        | 0.17 | 0.46 | 0.38  | 5.17E-03         |
| KRE29   | 16        | 100.28     | 33          | 102.68       | 0.18 | 0.42 | 0.43  | 5.19E-03         |
| GTR2    | 21        | 95.56      | 30          | 72.23        | 0.26 | 0.61 | 0.43  | 5.48E-03         |
| MSC2    | 29        | 164.55     | 47          | 155.00       | 0.20 | 0.39 | 0.52  | 5.83E-03         |
| YKU70   | 32        | 158.53     | 47          | 139.29       | 0.24 | 0.45 | 0.52  | 6.07E-03         |
| BIT2    | 23        | 138.58     | 35          | 114.20       | 0.19 | 0.39 | 0.48  | 6.53E-03         |
| YGR122W | 9         | 80.37      | 23          | 83.55        | 0.12 | 0.34 | 0.35  | 6.69E-03         |
| YAL037W | 3         | 55.95      | 11          | 45.04        | 0.06 | 0.30 | 0.19  | 7.09E-03         |
| YPR013C | 8         | 64.52      | 22          | 72.67        | 0.14 | 0.39 | 0.35  | 7.19E-03         |
| LRG1    | 41        | 242.85     | 65          | 250.76       | 0.19 | 0.32 | 0.60  | 7.57E-03         |
| RMP1    | 3         | 45.58      | 11          | 39.25        | 0.07 | 0.35 | 0.20  | 8.83E-03         |
| PET100  | 3         | 35.50      | 9           | 25.54        | 0.09 | 0.48 | 0.19  | 8.88E-03         |
| FRE6    | 8         | 135.79     | 21          | 138.28       | 0.06 | 0.17 | 0.36  | 9.07E-03         |
| PHM6    | 1         | 20.54      | 9           | 23.33        | 0.05 | 0.54 | 0.09  | 9.12E-03         |
| YGR237C | 35        | 177.58     | 57          | 187.92       | 0.23 | 0.39 | 0.59  | 9.49E-03         |
| NPL6    | 11        | 111.64     | 23          | 104.76       | 0.11 | 0.26 | 0.41  | 9.65E-03         |
