# Supplementary material for: Positive selection for unpreferred codon usage in eukaryotic genomes
Source: PubMed Central journal article supplement (PMC1936986; doi:10.1186/1471-2148-7-119), 2007-07-18
Supplement: 1471-2148-7-119-S7.pdf [file 1471-2148-7-119-S7.pdf]

## Additional File 7

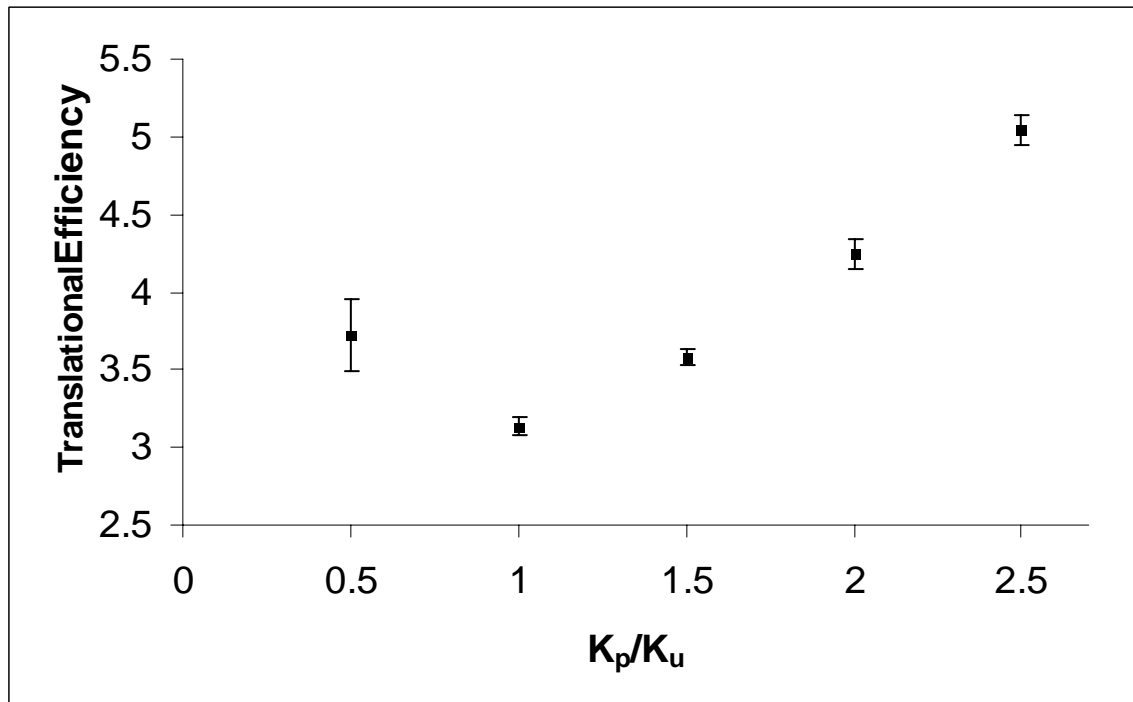

Translational efficiency is significantly correlated with  $K_p/K_u$  in *Saccharomyces cerevisiae* (Spearman's  $\rho = 0.029$ ;  $p < 0.00001$ ). Translational efficiency values were derived from empirical data<sup>1</sup>.

1: MacKay VL, Li X, Flory MR, Turcott E, Law GL, Serikawa KA, Xu XL, Lee H, Goodlett DR, Aebersold R, Zhao LP, Morris DR.  
Gene expression analyzed by high-resolution state array analysis and quantitative proteomics: response of yeast to mating pheromone.  
Mol Cell Proteomics. 2004 May;3(5):478-89. Epub 2004 Feb 6.  
PMID: 14766929 [PubMed - indexed for MEDLINE]
