# Supplementary material for: Positive selection for unpreferred codon usage in eukaryotic genomes
Source: PubMed Central journal article supplement (PMC1936986; doi:10.1186/1471-2148-7-119), 2007-07-18
Supplement: 1471-2148-7-119-S8.pdf [file 1471-2148-7-119-S8.pdf]

## Additional File 8

*Cryptococcus* genes with at least one uORF in reference strain (JEC21):

|          |          |          |          |          |
|----------|----------|----------|----------|----------|
| CNA00030 | CNA00210 | CNA00400 | CNA00630 | CNA00680 |
| CNA00690 | CNA00880 | CNA01140 | CNA01280 | CNA01590 |
| CNA01610 | CNA01930 | CNA02060 | CNA02150 | CNA02610 |
| CNA02720 | CNA03080 | CNA03150 | CNA03850 | CNA04130 |
| CNA04250 | CNA04290 | CNA04660 | CNA04690 | CNA04760 |
| CNA05050 | CNA05330 | CNA05410 | CNA05590 | CNA05920 |
| CNA06050 | CNA06310 | CNA06520 | CNA06530 | CNA06610 |
| CNA07240 | CNA07430 | CNA07560 | CNA07940 | CNA08100 |
| CNA08190 | CNB00170 | CNB00520 | CNB00650 | CNB00850 |
| CNB00980 | CNB01850 | CNB01890 | CNB02080 | CNB02410 |
| CNB02460 | CNB02580 | CNB02730 | CNB03300 | CNB03670 |
| CNB04030 | CNB04110 | CNB04180 | CNB04340 | CNB05480 |
| CNB05530 | CNB05710 | CNB05740 | CNB05750 | CND01310 |
| CND01330 | CND01380 | CND01430 | CND01900 | CND02100 |
| CND02150 | CND02270 | CND02460 | CND02670 | CND02770 |
| CND03090 | CND03160 | CND03310 | CND03400 | CND03640 |
| CND04080 | CND04140 | CND04500 | CND04620 | CND04710 |
| CND04750 | CND04870 | CND05280 | CND05330 | CND05600 |
| CND05620 | CND06170 | CND06180 | CNE00500 | CNE01300 |
| CNE01500 | CNE01570 | CNE01580 | CNE02070 | CNE02240 |
| CNE02570 | CNE02700 | CNE03010 | CNE03570 | CNE03600 |
| CNE03660 | CNE03970 | CNE03980 | CNE04120 | CNE04130 |
| CNE04180 | CNE04480 | CNE04770 | CNE04840 | CNE04970 |
| CNF01210 | CNF01280 | CNF01580 | CNF01760 | CNF01940 |
| CNF02030 | CNF02110 | CNF02350 | CNF02390 | CNF02560 |
| CNF02680 | CNF02810 | CNF02850 | CNF02930 | CNF02940 |
| CNF02980 | CNF03240 | CNF03260 | CNF03750 | CNF03960 |
| CNF04090 | CNF04220 | CNG00120 | CNG00390 | CNG00440 |
| CNG00640 | CNG00990 | CNG01040 | CNG01410 | CNG01530 |
| CNG01550 | CNG01590 | CNG01690 | CNG01970 | CNG02190 |
| CNG02270 | CNG02430 | CNG02520 | CNG03170 | CNG03330 |
| CNG03580 | CNG03930 | CNG03960 | CNG04110 | CNG04280 |
| CNG04310 | CNG04660 | CNH03770 | CNH03300 | CNH03100 |
| CNH02880 | CNH02120 | CNH02060 | CNH01670 | CNH01650 |
| CNH01190 | CNH00600 | CNH00380 | CNH00290 | CNI00090 |
| CNI00380 | CNI00420 | CNI00740 | CNI01370 | CNI01670 |
| CNI01780 | CNI01870 | CNI01890 | CNI02760 | CNI02980 |
| CNI03200 | CNI03420 | CNI03450 | CNI04160 | CNJ00300 |
| CNJ00320 | CNJ00430 | CNJ00600 | CNJ00870 | CNJ00900 |
| CNJ01090 | CNJ01190 | CNJ01600 | CNJ01610 | CNJ01700 |
| CNJ01860 | CNJ02580 | CNJ02620 | CNJ02710 | CNJ03150 |
| CNJ03190 | CNK00130 | CNK00140 | CNK00770 | CNK00780 |

|          |          |          |          |          |
|----------|----------|----------|----------|----------|
| CNK00880 | CNK00890 | CNK00920 | CNK01200 | CNK01340 |
| CNK01510 | CNK01680 | CNK01690 | CNK01850 | CNK02050 |
| CNK02320 | CNK02420 | CNK02690 | CNK02740 | CNK02850 |
| CNK03450 | CNL03770 | CNL03880 | CNL04370 | CNL04400 |
| CNL04520 | CNL04770 | CNL05080 | CNL05290 | CNL05710 |
| CNL05850 | CNL05890 | CNL05970 | CNL06000 | CNL06020 |
| CNL06100 | CNL06340 | CNL06680 | CNM00260 | CNM00660 |
| CNM00790 | CNM00900 | CNM01640 | CNM01880 | CNM01960 |
| CNM02370 | CNM02500 | CNN00530 | CNN00790 | CNN00970 |
| CNN01660 |          |          |          |          |

*Cryptococcus* genes with at least one **conserved** uORF:

|          |          |          |          |          |
|----------|----------|----------|----------|----------|
| CNA00030 | CNA00210 | CNA00630 | CNA00880 | CNA01140 |
| CNA01590 | CNA01610 | CNA01930 | CNA02060 | CNA02150 |
| CNA03080 | CNA03150 | CNA04690 | CNA05050 | CNA05330 |
| CNA05410 | CNA05920 | CNA07240 | CNA07560 | CNA08190 |
| CNB00170 | CNB00520 | CNB01850 | CNB01890 | CNB02080 |
| CNB02460 | CNB03300 | CNB04180 | CNB04340 | CNB05530 |
| CNB05740 | CND01310 | CND01380 | CND02100 | CND02270 |
| CND02460 | CND02670 | CND03400 | CND04500 | CND05330 |
| CND05620 | CND06180 | CNE00500 | CNE01300 | CNE02070 |
| CNE03660 | CNE03970 | CNE04120 | CNE04130 | CNE04180 |
| CNE04480 | CNE04970 | CNF02030 | CNF02110 | CNF02930 |
| CNF02940 | CNF03260 | CNF03750 | CNF03960 | CNG00440 |
| CNG01040 | CNG01410 | CNG01550 | CNG02190 | CNG02270 |
| CNG02430 | CNG03580 | CNG04110 | CNG04280 | CNG04660 |
| CNH03770 | CNH02880 | CNH02120 | CNH02060 | CNH01190 |
| CNH00380 | CNI00420 | CNI01670 | CNI01780 | CNI02760 |
| CNI03450 | CNI04160 | CNJ01700 | CNJ01860 | CNJ02620 |
| CNJ02710 | CNK00780 | CNK00920 | CNK01200 | CNK01510 |
| CNK01690 | CNK01850 | CNK02320 | CNK02420 | CNK03450 |
| CNL03770 | CNL03880 | CNL04370 | CNL04400 | CNL04520 |
| CNL04770 | CNL06000 | CNM00260 | CNM00660 | CNM00790 |
| CNM00900 | CNN00530 |          |          |          |

*Drosophila* genes with at least one uORF in reference species (*melanogaster*):

CG11357-PA CG4840-PA CG13213-PC CG7979-PA CG7187-PC  
CG9027-PB CG2503-PA CG9134-PB CG16987-PA CG4433-PB  
CG5344-PB CG31284-PC CG3073-PA CG10687-PA CG8600-PA  
CG10639-PA CG3613-PA CG1079-PA CG4218-PA CG4019-PA  
CG9072-PA CG10660-PA CG10869-PA CG13890-PA CG4670-PA  
CG2224-PA CG9643-PA CG8815-PD CG17054-PD CG12797-PA  
CG17377-PC CG4068-PB CG3771-PA CG32308-PB CG7075-PA  
CG12210-PB CG17717-PA CG8323-PA CG8080-PA CG2813-PA  
CG10653-PA CG5378-PA CG1883-PD CG4707-PA CG7499-PA  
CG8776-PA CG11926-PA CG9772-PA CG30001-PA CG3502-PA  
CG8152-PA CG6870-PA CG6199-PB CG4585-PA CG1009-PE  
CG9045-PE CG8091-PA CG2993-PA CG33713-PA CG4659-PA  
CG10757-PA CG2244-PB CG8372-PB CG18336-PA CG2046-PA  
CG9165-PA CG16983-PE CG17019-PA CG12283-PA CG9326-PB  
CG32037-PA CG10754-PA CG14657-PB CG7740-PC CG8604-PA  
CG10949-PA CG2023-PA CG13949-PA CG17248-PE CG31961-PB  
CG8444-PA CG7142-PA CG12317-PB CG4356-PA CG9175-PB  
CG31365-PA CG3637-PA CG7182-PA CG3476-PA CG10522-PA  
CG5973-PC CG5215-PB CG7020-PA CG12073-PA CG18397-PA  
CG32491-PN CG8300-PA CG10160-PA CG11887-PA CG18330-PA  
CG12750-PA CG6190-PA CG14992-PA CG17603-PC CG31694-PA  
CG13366-PA CG5146-PA CG4427-PA CG2718-PC CG1133-PA  
CG4681-PA CG10221-PA CG8290-PB CG13475-PA CG8657-PA  
CG8309-PA CG4622-PA CG2616-PA CG3798-PF CG33472-PA  
CG6549-PC CG12289-PA CG9582-PA CG12162-PA CG8298-PA  
CG1868-PB CG4370-PA CG18317-PA CG11063-PB CG6282-PB  
CG12090-PC CG7910-PA CG6249-PA CG5824-PA CG8785-PA  
CG13784-PA CG3935-PA CG13123-PA CG9536-PA CG4063-PA  
CG11523-PA CG17258-PA CG8039-PA CG9358-PA CG2916-PB  
CG10173-PA CG13907-PA CG11421-PA CG18314-PC CG5387-PA  
CG31908-PA CG6015-PA CG9044-PA CG9263-PA CG18210-PA  
CG10742-PA CG18642-PA CG4677-PB CG1309-PA CG9181-PA  
CG3860-PA CG31259-PA CG8121-PB CG9921-PA CG7870-PA  
CG4813-PA CG18003-PB CG10072-PA CG3929-PA CG5026-PB  
CG10217-PB CG4496-PA CG3658-PA CG13345-PA CG6191-PA  
CG3977-PA CG9114-PA CG33650-PA CG8368-PA CG2934-PA  
CG4379-PA CG4213-PA CG12404-PA CG4944-PB CG15309-PA  
CG12740-PB CG2128-PA CG7492-PA CG15580-PB CG8830-PB  
CG14939-PA CG10337-PA CG8814-PA CG7125-PA CG3165-PA  
CG15822-PC CG7035-PB CG8312-PA CG9224-PA CG7201-PA  
CG2846-PA CG16758-PF CG7830-PA CG30427-PA CG7927-PA  
CG10574-PA CG5354-PA CG13933-PA CG15880-PA CG31786-PA  
CG8230-PA CG8005-PA CG7745-PA CG7261-PA CG5888-PA

CG5846-PA CG3436-PA CG1024-PA CG13920-PA CG8704-PA  
CG11907-PB CG31546-PA CG9657-PA CG6315-PA CG6376-PB  
CG6619-PA CG6412-PA CG5837-PA CG11883-PB CG6121-PA  
CG4527-PC CG12730-PA CG17509-PA CG1492-PA CG6353-PA  
CG7524-PF CG31974-PA CG7986-PB CG11753-PA CG2108-PA  
CG8525-PA CG32280-PC CG8493-PB CG9104-PA CG17611-PA  
CG11737-PA CG12030-PA CG6705-PB CG9242-PA CG3955-PA  
CG6816-PA CG33505-PA CG11576-PA CG11660-PA CG6674-PA  
CG12016-PB CG3702-PA CG7161-PA CG6329-PB CG8520-PA  
CG6321-PA CG12772-PA CG7115-PB CG8816-PA CG5012-PA  
CG7164-PA CG3075-PA CG4042-PA CG4623-PA CG12902-PB  
CG10904-PA CG2943-PA CG9948-PA CG9222-PA CG7149-PA  
CG9014-PA CG10898-PA CG1962-PC CG3183-PA CG9828-PB  
CG3727-PC CG11679-PA CG12316-PA CG12052-PQ CG4058-PA  
CG10528-PA CG1418-PA CG15386-PA CG4079-PA CG17124-PA  
CG8631-PA CG10198-PA CG9172-PA CG3194-PA CG1444-PA  
CG32407-PA CG12831-PA CG17285-PA CG8839-PE CG2031-PA  
CG10212-PA CG6627-PA CG3810-PB CG11990-PA CG6704-PA  
CG6988-PA CG12025-PA CG7109-PA CG10703-PA CG10541-PA  
CG10121-PD CG4449-PA CG12026-PA CG6181-PB CG9281-PB  
CG14762-PA CG18869-PA CG12342-PA CG4230-PA CG3654-PD  
CG9323-PA CG8236-PA CG5263-PB CG32381-PA CG7044-PA  
CG14655-PA CG8556-PA CG7197-PA CG1318-PD CG10254-PB  
CG4775-PA CG9780-PA CG4323-PB CG6575-PA CG1134-PA  
CG10060-PA CG3587-PA CG10206-PA CG12891-PA CG10372-PA  
CG9523-PA CG8116-PA CG9008-PC CG3504-PA CG33162-PA  
CG5295-PA CG12846-PA CG8529-PE CG12249-PA CG3567-PA  
CG13222-PA CG12084-PA CG33097-PA CG5087-PA CG3876-PA  
CG4237-PA CG5823-PA CG7104-PA CG1137-PA CG12189-PA  
CG10462-PA CG7516-PA CG32372-PA CG1101-PA CG8616-PA  
CG17608-PA CG11206-PA CG8560-PA CG12186-PA CG30415-PA  
CG3309-PA CG4852-PA CG4609-PA CG12391-PA CG3790-PA  
CG33691-PB CG6543-PA CG7223-PB CG17723-PE CG32022-PA  
CG7047-PA CG7004-PB CG32343-PA CG9258-PA CG31635-PA  
CG8409-PA CG31805-PA CG5001-PA CG9302-PA CG12127-PA  
CG13148-PB CG1172-PA CG14971-PA CG12341-PA CG10252-PA  
CG3409-PA CG10467-PA CG12069-PA CG9147-PA CG14440-PA  
CG1381-PA CG4690-PA CG7112-PA CG12099-PB CG10144-PA  
CG16932-PB CG1107-PB CG31176-PA CG2928-PA CG14299-PA  
CG5171-PA CG13893-PA CG13322-PA CG4545-PA CG8277-PA  
CG4445-PA CG2852-PA CG2221-PA CG5371-PA CG2677-PA  
CG11440-PA CG4468-PA CG7300-PB CG6903-PA CG9153-PA  
CG2161-PB CG10776-PA CG3488-PA CG7915-PA CG3556-PA  
CG15251-PA CG5261-PA CG1146-PA CG12091-PA CG13305-PA  
CG3595-PA CG3335-PA CG14968-PB CG1935-PA CG6845-PA  
CG4114-PA CG13326-PA CG13400-PA CG4692-PB CG5893-PA

CG8833-PA CG4389-PA CG7503-PA CG7948-PA CG30362-PA  
CG5486-PB CG17084-PA CG14636-PA CG8563-PA CG2938-PB  
CG9261-PD CG7154-PA CG10385-PA CG3797-PA CG10576-PA  
CG3331-PA CG1898-PA CG9159-PA CG6757-PA CG12075-PB  
CG6767-PA CG7479-PA CG6097-PA CG8516-PA CG3403-PA  
CG30365-PA CG6647-PA CG11188-PA CG6207-PC CG4141-PB  
CG4914-PA CG9211-PA CG2872-PB CG3539-PC CG17184-PB  
CG13601-PA CG32700-PB CG9663-PA CG12187-PA CG12470-PA  
CG6709-PA CG3644-PB CG13398-PA CG6297-PB CG1599-PA  
CG8772-PB CG9586-PB CG15862-PB CG7009-PA CG10253-PA  
CG15147-PA CG3501-PA CG17068-PA CG5651-PA CG7359-PA  
CG5687-PA CG4422-PA CG10480-PA CG7576-PA CG9267-PA  
CG10539-PA CG18802-PA CG9135-PB CG30431-PA CG4241-PC  
CG5288-PC CG2841-PC CG2818-PA CG1515-PA CG7175-PA  
CG13211-PB CG6713-PB CG12240-PA CG2845-PA CG16717-PA  
CG33261-PE CG11567-PA CG3735-PA CG12155-PA CG14351-PA  
CG12141-PA CG7108-PA CG11455-PB CG2922-PG CG12393-PA  
CG7764-PA CG15013-PB CG2911-PA CG3279-PA CG11508-PA  
CG13098-PA CG3074-PB CG30023-PA CG5273-PB CG31839-PA  
CG6513-PA CG10973-PA CG6230-PA CG10988-PA CG7018-PA  
CG9779-PA CG5638-PA CG8553-PB CG7379-PA CG7772-PA  
CG1317-PB CG2051-PB CG10830-PA CG9515-PA CG8596-PA  
CG12159-PA CG3127-PA CG7912-PA CG13253-PA CG8057-PA  
CG7042-PA CG1071-PA CG17181-PA CG7200-PA CG10387-PA  
CG12410-PA CG10103-PA CG5906-PA CG5383-PA CG3159-PA  
CG32300-PB CG4675-PB CG1488-PB CG2086-PB CG2127-PA  
CG4217-PB CG8024-PB CG6016-PB CG18171-PA CG2097-PA  
CG17712-PA CG7222-PA CG9717-PA CG5392-PA CG11201-PA  
CG14030-PA CG9035-PA CG31849-PA CG3192-PA CG4643-PA  
CG11309-PB CG10596-PB CG1900-PA CG8032-PA CG4454-PA  
CG2698-PA CG8357-PA CG3022-PA CG2114-PA CG15154-PA  
CG9853-PA CG7737-PA CG14825-PA CG31689-PB CG5337-PA  
CG1034-PD CG6583-PA CG4293-PA CG6416-PF CG4057-PA  
CG3925-PA CG10691-PB CG12935-PA CG11427-PA CG1049-PC  
CG8597-PE CG32103-PB CG14536-PA CG10808-PA CG33489-PA  
CG3078-PA CG10590-PA CG10908-PA CG10698-PA CG14804-PA  
CG7803-PA CG7962-PA CG8964-PA CG3249-PA CG3835-PA  
CG6743-PA CG2857-PA CG5461-PA CG9100-PC CG11760-PB  
CG1004-PA CG2216-PD CG17030-PA CG10947-PC CG5339-PA  
CG11444-PA

*Drosophila* genes with at least one **conserved** uORF:

CG4840-PA CG13213-PC CG7979-PA CG7187-PC CG9027-PB  
CG2503-PA CG9134-PB CG16987-PA CG4433-PB CG5344-PB  
CG3073-PA CG10687-PA CG10639-PA CG3613-PA CG1079-PA  
CG4218-PA CG10660-PA CG13890-PA CG4670-PA CG2224-PA  
CG8815-PD CG12797-PA CG4068-PB CG3771-PA CG7075-PA  
CG17717-PA CG8323-PA CG8080-PA CG5378-PA CG1883-PD  
CG4707-PA CG7499-PA CG8776-PA CG11926-PA CG8152-PA  
CG6870-PA CG4585-PA CG9045-PE CG2993-PA CG33713-PA  
CG4659-PA CG2244-PB CG2046-PA CG9165-PA CG17019-PA  
CG12283-PA CG9326-PB CG14657-PB CG7740-PC CG2023-PA  
CG17248-PE CG31961-PB CG8444-PA CG7142-PA CG12317-PB  
CG4356-PA CG9175-PB CG31365-PA CG3637-PA CG3476-PA  
CG10522-PA CG7020-PA CG12073-PA CG18397-PA CG8300-PA  
CG11887-PA CG18330-PA CG6190-PA CG31694-PA CG13366-PA  
CG5146-PA CG4427-PA CG2718-PC CG1133-PA CG4681-PA  
CG10221-PA CG8657-PA CG4622-PA CG2616-PA CG3798-PF  
CG33472-PA CG6549-PC CG12162-PA CG4370-PA CG11063-PB  
CG6282-PB CG12090-PC CG7910-PA CG5824-PA CG8785-PA  
CG13784-PA CG3935-PA CG13123-PA CG9536-PA CG4063-PA  
CG11523-PA CG8039-PA CG13907-PA CG18314-PC CG5387-PA  
CG31908-PA CG6015-PA CG9044-PA CG18642-PA CG4677-PB  
CG1309-PA CG3860-PA CG31259-PA CG7870-PA CG18003-PB  
CG3929-PA CG5026-PB CG10217-PB CG4496-PA CG3658-PA  
CG6191-PA CG3977-PA CG9114-PA CG33650-PA CG8368-PA  
CG2934-PA CG4379-PA CG12404-PA CG12740-PB CG2128-PA  
CG7492-PA CG8830-PB CG14939-PA CG8814-PA CG15822-PC  
CG7035-PB CG8312-PA CG7201-PA CG16758-PF CG7830-PA  
CG30427-PA CG7927-PA CG10574-PA CG13933-PA CG15880-PA  
CG31786-PA CG8230-PA CG8005-PA CG7745-PA CG7261-PA  
CG5846-PA CG3436-PA CG13920-PA CG6315-PA CG6619-PA  
CG6412-PA CG5837-PA CG6121-PA CG4527-PC CG12730-PA  
CG17509-PA CG1492-PA CG7524-PF CG7986-PB CG11753-PA  
CG2108-PA CG8525-PA CG8493-PB CG12030-PA CG6705-PB  
CG9242-PA CG3955-PA CG6816-PA CG33505-PA CG11576-PA  
CG11660-PA CG6674-PA CG3702-PA CG7161-PA CG6329-PB  
CG8520-PA CG6321-PA CG7115-PB CG5012-PA CG7164-PA  
CG4042-PA CG12902-PB CG10904-PA CG2943-PA CG9948-PA  
CG9222-PA CG7149-PA CG10898-PA CG1962-PC CG3183-PA  
CG9828-PB CG3727-PC CG11679-PA CG12316-PA CG1418-PA  
CG15386-PA CG17124-PA CG10198-PA CG9172-PA CG3194-PA  
CG32407-PA CG12831-PA CG8839-PE CG2031-PA CG6627-PA  
CG3810-PB CG11990-PA CG12025-PA CG10703-PA CG10541-PA  
CG10121-PD CG12342-PA CG3654-PD CG5263-PB CG32381-PA

CG7044-PA CG14655-PA CG8556-PA CG1318-PD CG10254-PB  
CG4775-PA CG4323-PB CG6575-PA CG1134-PA CG10060-PA  
CG10206-PA CG10372-PA CG8116-PA CG9008-PC CG3504-PA  
CG33162-PA CG12249-PA CG3567-PA CG13222-PA CG3876-PA  
CG4237-PA CG7104-PA CG7516-PA CG1101-PA CG17608-PA  
CG11206-PA CG30415-PA CG3309-PA CG4852-PA CG3790-PA  
CG33691-PB CG7223-PB CG17723-PE CG7047-PA CG7004-PB  
CG32343-PA CG9258-PA CG31635-PA CG5001-PA CG9302-PA  
CG13148-PB CG14971-PA CG12341-PA CG3409-PA CG14440-PA  
CG1381-PA CG7112-PA CG12099-PB CG10144-PA CG16932-PB  
CG1107-PB CG31176-PA CG2928-PA CG14299-PA CG13893-PA  
CG13322-PA CG4545-PA CG8277-PA CG4445-PA CG2852-PA  
CG11440-PA CG4468-PA CG7300-PB CG6903-PA CG9153-PA  
CG2161-PB CG10776-PA CG3488-PA CG1146-PA CG12091-PA  
CG13305-PA CG3595-PA CG3335-PA CG14968-PB CG4114-PA  
CG13400-PA CG4692-PB CG5893-PA CG4389-PA CG7948-PA  
CG30362-PA CG17084-PA CG8563-PA CG2938-PB CG7154-PA  
CG10385-PA CG3797-PA CG3331-PA CG1898-PA CG6757-PA  
CG12075-PB CG7479-PA CG6097-PA CG8516-PA CG3403-PA  
CG6647-PA CG11188-PA CG6207-PC CG4141-PB CG4914-PA  
CG9211-PA CG2872-PB CG3539-PC CG32700-PB CG9663-PA  
CG3644-PB CG6297-PB CG8772-PB CG15862-PB CG15147-PA  
CG3501-PA CG17068-PA CG7359-PA CG5687-PA CG7576-PA  
CG9267-PA CG18802-PA CG9135-PB CG30431-PA CG5288-PC  
CG2841-PC CG2818-PA CG7175-PA CG13211-PB CG6713-PB  
CG12240-PA CG2845-PA CG11567-PA CG14351-PA CG12393-PA  
CG7764-PA CG11508-PA CG30023-PA CG5273-PB CG10973-PA  
CG6230-PA CG7018-PA CG5638-PA CG8553-PB CG7379-PA  
CG7772-PA CG1317-PB CG10830-PA CG9515-PA CG3127-PA  
CG13253-PA CG8057-PA CG1071-PA CG17181-PA CG7200-PA  
CG10387-PA CG12410-PA CG10103-PA CG5906-PA CG5383-PA  
CG3159-PA CG32300-PB CG2086-PB CG8024-PB CG6016-PB  
CG18171-PA CG2097-PA CG7222-PA CG9717-PA CG5392-PA  
CG11201-PA CG31849-PA CG3192-PA CG4643-PA CG8032-PA  
CG2698-PA CG8357-PA CG3022-PA CG15154-PA CG9853-PA  
CG7737-PA CG14825-PA CG31689-PB CG5337-PA CG1034-PD  
CG4293-PA CG6416-PF CG4057-PA CG12935-PA CG11427-PA  
CG8597-PE CG32103-PB CG14536-PA CG10808-PA CG3078-PA  
CG10908-PA CG10698-PA CG7803-PA CG8964-PA CG3835-PA  
CG5461-PA CG9100-PC CG1004-PA CG2216-PD CG10947-PC  
CG5339-PA CG11444-PA



*Saccharomyces* genes with at least one uORF in reference strain (*cerevisiae*):

YOL138C HPA2 SHU2 JAC1 YER130C RTS1 PUS2 BEM1  
YML020W YCK1 LAS17KOG1 CYC3 ODC2 PEX22 YDL025C GLG1  
YSY6 NPT1 YOR004W RRP46 YMR233W MEU1 HUS1 YPR114W  
YTM1 DAL7 YPR091C STE13 YLR307C-A LEU9 ZRT1 MSC3 IES3  
RPS26B PPH21 ATO3 SBP1 VMA6 OST2 RBG1 YGR251W SKY1  
YHL026C SGO1 LYS9 RPI1 SBH1 BUD20 YJR054W NDE1  
MRM2BSP1 SFK1 PMD1 PRP43 RPL24B YMR130W SPT15 RMD5  
RCR1 RAD59 NAS2 YLR364W FAS1 LHP1 YJR096W  
YGL059W YLR073C RPL18A UGA3 FYV7 MTR2 HEM12  
TGS1 YGR068C KTI12 PFD1 YNG1 AQY2 YLR301W RPL35A  
YGL176C MDM35 TES1 PCT1 YDR387C YOR338W  
TOM40 YNR034W-A VMA21 PMU1 PAC2 YJL213W  
YJR116W HOT13 MKS1 STP2 ALT2 RMT2 HFA1 POP3 YPC1  
RPS24A YBR220C SSN8 YMR166C COX13 HTB1 ARV1  
BUR6 MTM1 SLA1 RDS2 FEN2 SGE1 CMP2 BNI5 YNL211C LPP1  
STE2 RXT3 GUT1 KRE11 PDR16 FMP50 MOD5 CFD1 MRS3  
YHR138C CTS1 YCR015C PAN2 YGR149W DBF4 YPL191C  
RAD24 YMR090W SRP68 RRN9 PPM1 DOA1 YBL009W RHO3  
YHR112C YER087W RBA50 HSH49 UBA3 AGX1 GTR1  
YEL006W RRP14 YOL057W LST7 YGL250W CIN5 RRN6  
YCR023C YMC2 YPR109W SNF12 RPL30 YOL036W YTA7  
YNL187W MAD2 ATP18 IPI3 YDR090C YKL098W VPS8 TMT1  
RGS2 WHI5 PHO89 ARO9 SAP185 MEP2 YER139C GCN3  
LYS12 BCH1 ERG7 GSP2 URA6 IDI1 YOR051C HEM3 ORT1 URK1  
EAF6 SMY2 YIL083C UGA1 YMR204C YLR137W VMA13  
PTC4 YOL159C-A BFR2 RGP1 SIT4 DCC1 YIL055C APP1 UBR2  
HAP4 ACC1 IST2 PHM8 RPC11 SGT1 PUF2 MFA1 YBR028C GAD1  
NDC1 VHT1 DIN7 YKL050C YHR159W RPS22A APA2 RSC6  
BYE1 RPP1 BSPT2 YIM1 EBS1 RIB5 YIR003W YET2 ARP6  
CDC36 CHS5 PCL5 NTF2 RPL32 MET3 ECM7 YKL151C RAD1  
NOP10 AGA2 YKR022C MET32 SER3 YDL146W ADE8  
PDA1 ELC1 RCN1 YOR352W MRP51 GCN4 MRPL31 PEP1  
VPS35 MKK2 YPL225W YFR045W PTC7 ADA2 THG1 GTT1 NVJ1  
YHR009C SRB8 SEM1 BAP3 RHO1 FET4 TIF34 YLR168C  
YBR108W RTG2 YOR304C-A SUR1 ARP7 TBF1 YBL028C  
YBL029C-A POP1 YGL114W MCH1 SOH1 HUB1 UME6 ALG5 MNN2  
IMP3 CIT1 COX4 PEX12 UMP1 YGR093W GCN5 SFH1 YOL125W  
CSM2 YKR017C PGK1 RPC40 ER11 AGP1 SRP102 OST6  
YMR034C BAS1 ERG26 COX14 RDH54 SSY5 DSS4  
YOL015W RBF9 RLF2 YIR035C CBP1 RIF2 YPL034W YNG2  
SIA1 DLD1 YOR044W CDC21 DUR3 ISA1 SDS22 YDR128W  
YGR131W YLR413W YDR539W BCK2 YMR171C FAF1 HTZ1  
ATG5 RPT5 PSY3 CWC21 CWC27 MAL33 AGP2 SEC65

MSE1 DCW1 FMO1 YFR017C DUS3 MNR2 RAD53 RRN11  
YDL176W AFT2 STN1 BDH1 ECM2 FSH2 YBL039W-B VPS55 RAI1  
PPZ1 ALR1 YBR285W MVD1 JIP4 ERV14 YER137C TPK1  
PET111 FIG1 TRS33 CSE1 SYP1 YNL191W UBC8 IPK1 SPB4  
HRB1 LSM1 DLD3 YAP1 PIC2 RMD6 YHL010C YNL254C  
YAL027W AMS1 RPF1 DBR1 YRO2 ARO4 RPB4 NRG1 CLN3  
YDR306C PAN6 SNU66 APN1 EXO84 GID7

*Saccharomyces* genes with at least one **conserved** uORF:

YER130C PUS2 YCK1 KOG1 GLG1 YPR091C ZRT1 MSC3  
RPS26B SBP1 OST2 YHL026C SGO1 RPI1 BUD20  
YJR054W NDE1 PMD1 RPL24B FAS1 LHP1 YLR073C YNG1  
RPL35A YOR338W YJL213W MKS1 HFA1 RPS24A  
YBR220C SSN8 ARV1 BUR6 MTM1RDS2 STE2 MRS3 CTS1 SRP68  
RHO3 YEL006W LST7 RRN6 YOL036W YNL187W TMT1  
SAP185 BCH1 ERG7 URA6 YOR051C HEM3 URK1 UGA1 BFR2  
YIL055C APP1 HAP4 ACC1 PHM8 RPC11NDC1 RPL32ECM7  
YKL151C RAD1 YKR022C SER3 YDL146W PDA1 ELC1 GCN4  
MKK2 THG1 YBR108W ARP7 YGL114W COX4 PGK1 ERI1  
YMR034C COX14 RDH54 YPL034W YLR413W BCK2  
ATG5 MAL33 AGP2 YFR017C MNR2 YDL176W VPS55 ALR1  
JIP4 PET111 SYP1 HRB1 YRO2 NRG1 CLN3 YDR306C
