# Supplementary material for: Positive selection for unpreferred codon usage in eukaryotic genomes
Source: PubMed Central journal article supplement (PMC1936986; doi:10.1186/1471-2148-7-119), 2007-07-18
Supplement: 1471-2148-7-119-S9.pdf [file 1471-2148-7-119-S9.pdf]

**Additional File 9.** Mutation profiles derived from 5' leader and 3' flanking regions

| from | to | relative mutation rates (scaled to sum to 1) |                      |                   |
|------|----|----------------------------------------------|----------------------|-------------------|
|      |    | <i>Cryptococcus</i>                          | <i>Saccharomyces</i> | <i>Drosophila</i> |
| A    | C  | 0.03                                         | 0.04                 | 0.06              |
| A    | G  | 0.18                                         | 0.22                 | 0.11              |
| A    | T  | 0.04                                         | 0.05                 | 0.08              |
| T    | G  | 0.03                                         | 0.02                 | 0.04              |
| T    | A  | 0.04                                         | 0.05                 | 0.08              |
| T    | C  | 0.17                                         | 0.19                 | 0.11              |
| C    | T  | 0.19                                         | 0.15                 | 0.15              |
| C    | G  | 0.03                                         | 0.03                 | 0.04              |
| C    | A  | 0.04                                         | 0.04                 | 0.09              |
| G    | C  | 0.03                                         | 0.03                 | 0.04              |
| G    | T  | 0.03                                         | 0.03                 | 0.07              |
| G    | A  | 0.19                                         | 0.16                 | 0.12              |

Rates derived from 19,322 mutations in *Cryptococcus*,  
1,074 mutations in *Saccharomyces*, and 3,776 mutations in *Drosophila*
